# Supplementary material for: Unveiled reactivity of masked diformylmethane with enamines forming resonance-assisted hydrogen bonding leads to di-meta-substituted pyridines
Source: Commun Chem. 2024 Jun 28;7:146. doi: 10.1038/s42004-024-01228-w (PMC11213866; doi:10.1038/s42004-024-01228-w)
Supplement: Supplementary file 5 — Supplementary Data 2 [file 42004_2024_1228_MOESM5_ESM.xlsx]

## Sheet: Fig.5
															Fig.5G	immunoblot source data
	Fig.5C	IL-6 ELISA
	DMSO	-132.235	-174.588	-231.059	-353.714	-333.714	-63.6	-52.2667	-54.9333	-56.2667	-50.9333	-59.6
	SB2037	-231.059	-202.824	-219.294			-34.9333	-58.9333	-56.2667	3.06667	-56.2667	-56.2667
	LPS	747.765	493.647	578.353	1006.29	926.286	275.733	280.4	285.067	88.4	92.4	81.7333
	LPS/SB2037	119.529	138.353	343.059	300.571	357.714	97.7333	88.4	91.7333	27.7333	17.7333	11.0667
	Fig.5D	IL-6 mRNA relative level
	DMSO	1	1	1	1.02323	1.00046	1.04019	1.03417	1.01269	1.00001
	SB2037	0.606104	3.40996	1.11513	1.04194	1.28076	0.850493	1.17538	0.431943	1.4699
	LPS	1979.95	2046.5	2000.37	2270.09	1733.01	2977.89	2246.96	3111.01	2169.95
	LPS/SB2037	1044.17	812.213	1859.09	1788.26	1421.85	1770.31	1628.97	1630.05	1373.4
	Fig.5F	DCF-DA mean fluorescence intensity (MFI)
	DMSO	15931.4	12123.8	13855.5	11778.8	8512.2	12949.3	12814.3	10763.9	8512.2	12123.8	13855.5	11778.8
	SB2037	12851.1	9717.8	10290.7	8725.6	9925	10310.6	10255.5	11758.3	9925	9717.8	10290.7	8725.6
	LPS	24538.9	30785	24091.2	45437.3	45142	35182.9	34664.7	41562.6	45142	30785	24091.2	45437.3
	LPS/SB2037	15765.4	19317.7	18286.5	21318.9	20993.1	19085.7	17731.6	20831.2	20993.1	19317.7	18286.5	21318.9

## Sheet: Fig.S4
Fig.S4A						Fig.S4B					Fig.S4C	NO inhibition (%)
compounds	NO inhibition (%)					compounds	Cell viability (%)				concentration (μM)	3gi							3si							3ti							5a
3aa	-13	4	24			3aa	98	109	92		40	97	95	90.7343	86	87.35	82.5776	85.5104	87	79	74.6504	66	47.4608	48.21	51.8201	93	86	85.8392	83	54.109	53.9379	47.252	61	59	30.5944	40	39.3352	38.6635	38.6867
3ac	-11	-15	21			3ac	104	108	113		20	91	86	76.049	67	63.7119	55.2108	54.1042	75	75	59.2657	51	35.6417	34.2084	37.5446	79	73	65.5594	67	31.9483	32.2991	34.1185	65	68	43.8811	44	37.8578	39.2999	37.5446
3ad	-26	-14	26			3ad	115	100	82		10	73	69	53.6713	49	48.9381	42.4821	32.4054	62	59	41.7832	35	20.868	16.3882	22.6981	59	63	36.1888	31	19.3906	24.0255	16.9879	68	68	43.8811	48	42.2899	35.4813	31.8344
3af	-41	-30	26			3af	114	131	88		5	69	57	46.6783	31	32.687	22.7526	21.556	50	38	28.4965	14	12.0037	6.20525	15.2748	51	38	30.5944	27	4.61681	3.65951	7.85153	60	55	34.7902	31	35.6417	28.4805	21.556
3ae	-39	-36	25			3ae	140	143	95		2.5	59	51	31.993	29	22.3453	20.8433	10.1356	42	45	19.4056	13	2.40074	-1.43198	8.42256	48	27	15.9091	13	-2.77008	5.56881	2.71235	46	49	17.3077	31	14.9584	15.7518	12.9907
3ab	9	6	46			3ab	138	136	136		1.25	55	37	26.3986	27	19.3906	17.6611	8.99358	36	33	11.7133	-4	0.923361	-3.97772	4.42541	42	28	9.61538	9	-4.98615	-2.70485	-0.142755	46	33	18.7063	20	6.09418	24.6619	5.56745
3ag	-29	-15	27			3ag	134	134	140		0.63	52	47	20.8042	23	20.868	17.0247	11.8487	36	34	-0.17483	2	10.5263	-2.70485	2.71235	41	25	8.21678	12	-6.46353	-19.2522	-6.42398	41	30	12.4126	14	-8.67959	-3.34129	-6.995
3ai	-13	-22	29			3ai	112	110	139		0.32	38	34	27.7972	20	22.3453	11.2967	12.4197	19	14	17.3077	3	-3.50877	-10.3421	-4.71092	18	15	4.72028	24	-23.4534	-27.5259	-6.995	19	11	11.014	17	-10.8957	-7.79634	-8.13705
3aj	-28	-31	29			3aj	106	111	85
3aj'	-31	-23	29			3aj'	91	96	76
3al	31	9	46			3al	129	137	111		Fig.S4D	Cell viability (%)
3am	64	60	30			3am	143	145	129		concentration (μM)	3gi							3si							3ti							5a
3an	41	38	58			3an	133	148	111		40	82	107	97.3675	91	98.2143	126.079	115.156	87	95	89.5781	90	76.3393	100.026	88.6192	96	92	92.7515	90	79.0179	92.3753	95.3074	120	107	96.7905	95	78.125	81.8299	91.4239
3be	8	1	46			3be	135	144	128		20	96	121	91.886	125	105.58	136.831	115.804	120	137	102.272	100	94.1964	105.195	102.643	89	116	124.775	97	91.0714	103.541	108.684	106	102	104.291	99	89.0625	95.4769	106.095
3ce	19	17	45			3ce	140	123	118		10	106	84	105.445	100	114.286	125.872	109.115	132	143	116.408	111	100.223	112.225	114.509	144	133	95.925	115	109.152	112.019	109.547	131	113	108.042	108	98.2143	103.127	108.037
3de	26	-6	44			3de	114	119	154		5	95	107	78.9037	104	104.464	110.571	103.506	136	117	117.562	117	98.2143	119.462	111.057	132	141	109.196	110	95.7589	114.707	106.095	107	120	111.792	120	104.688	101.06	108.468
3ee	21	35	44			3ee	122	99	99		2.5	83	106	80.0577	104	106.473	107.263	101.133	117	104	123.044	125	103.571	115.74	109.547	100	110	120.736	125	111.607	111.398	100.054	105	106	110.638	117	107.366	110.158	110.626
3fe	19	15	44			3fe	106	118	84		1.25	92	96	81.5002	108	101.562	125.045	99.1909	94	92	82.0772	113	103.348	107.47	114.941	107	110	105.157	128	104.241	106.436	101.564	117	137	104.003	114	106.92	128.974	105.232
3ge	18	19	46			3ge	100	103	142		0.63	108	107	82.9427	112	92.4107	111.192	99.1909	98	89	95.348	118	97.0982	101.887	114.941	105	88	96.502	110	86.3839	113.052	105.232	103	122	94.4825	112	102.455	112.225	111.489
3he	31	44	41			3he	112	96	73		0.32	93	93	85.5391	115	88.1696	97.3378	104.369	84	99	93.04	114	95.7589	110.571	101.996	94	110	89.0011	107	105.357	115.12	101.348	110	107	97.656	114	95.5357	118.429	92.7184
3ie	44	23	53			3ie	122	124	123
3je	63	49	52			3je	135	109	112
3ke	49	33	57			3ke	158	162	94
3le	41	54	57			3le	168	130	139		Fig.S4E	NO inhibition (%)
3me	41	30	55			3me	201	152	125		concentration (μM)	Control								SB2031														SB2032					SB2033					SB2034					SB2035
3ne	51	27	57			3ne	131	165	133		40	2.77264	7.32428	18.8209	11.2941	4.19486	5.60498	12.4022	6.21118	75.9466	77.5862	68.4807	64.2353	54.5332	52.5801	51.2849	74.0223	74.0223	70	71	71	85.7288	95	49	52	50	66.9725	58	59	55	54	73.4964	64	23	21	13	14.7808	14	53
3oe	71	70	62			3oe	126	106	138		20	1.10906	2.00827	9.97732	5.64706	-3.11231	8.80783	0.335196	-7.45342	71.9376	67.2414	50.1134	54.3529	38.295	46.7082	46.5922	63.9665	63.9665	58	57	57	71.0499	70	40	42	43	58.8175	50	47	47	48	61.264	46	12	14	17	22.9358	16	47
3pe	59	38	60			3pe	112	115	125		10	0	-3.30774	7.93651	4.23529	-4.73613	7.20641	3.01676	12.4224	50.5568	51.7241	38.5488	37.4118	17.9973	11.4769	25.8101	40.5028	40.5028	39	36	34	57.1865	40	31	27	28	53.1091	42	28	26	25	44.9541	33	14	13	12	18.8583	20	38
3qe	39	31	49			3qe	99	114	134		5	-4.99076	-4.72534	3.85488	2.11765	-9.60758	4.00356	-11.0615	8.69565	39.8664	32.3276	18.8209	32.4706	9.87821	-2.93594	12.4022	22.067	22.067	26	25	30	32.7217	30	12	16	10	32.7217	25	13	16	21	26.1978	22	8	6	5	11.5189	3	19
3re	43	19	42			3re	105	109	96		2.5	-1.10906	-4.37094	7.93651	-9.17647	-14.479	0.800712	-16.4246	-6.21118	35.8575	24.569	-4.98866	15.5294	5.00677	5.60498	-3.01676	27.095	27.095	20	17	13	31.9062	12	17	13	13	30.2752	20	11	4	15	26.1978	16	9	1	6	14.7808	14	10
3se	48	27	45			3se	93	94	77
3te	48	38	47			3te	131	107	88
3ue	39	33	53			3ue	124	112	94		Fig.S4F	Cell viability (%)
3we	51	27	50			3we	147	120	121		concentration (μM)	Control								SB2031														SB2032					SB2033					SB2034					SB2035
3ve	29	7	54			3ve	212	123	96		40	120.402	101.57	93.617	139.848	102.911	107.469	101.82	117.499	93.3268	120.745	125.703	142.405	110.505	90.2244	128.698	108.018	120.132	143	114.659	110	105.552	105	104	96.3761	106	99.8041	131	99	84.8841	92	109.732	109	105	103.167	103	94.5787	110	70
3bi	49	44	54			3bi	157	123	106		20	118.575	113.935	95.7447	148.517	109.367	107.469	103.296	105.65	69.1855	110.638	124.791	114.304	117.053	100.481	133.12	100.639	114.207	154	115.442	117	107.12	122	106	99.5103	103	95.6238	111	108	94.5478	99	99.8041	131	114	100.816	110	99.8041	108	91
3ci	36	15	48			3ci	169	125	161		10	95.9196	115.113	104.787	115.209	104.43	93.6118	116.872	114.866	111.58	96.2766	130.266	139.367	121.146	95.6731	114.84	99.1638	104.334	153	124.584	120	128.021	122	109	95.3314	105	110.777	117	115	90.1077	98	119.138	115	114	101.339	110	104.507	120	110
3di	18	14	50			3di	114	134	102		5	101.766	106.281	114.362	111.559	92.6582	94.4963	93.5563	98.4092	83.9058	106.383	104.259	96.4557	126.467	125.481	102.162	90.9001	122.765	132	108.652	95	128.021	108	113	93.5031	90	116.525	129	105	85.1453	92	128.021	140	117	94.2866	99	109.732	112	108
3ei	56	40	20			3ei	118	120	125		2.5	105.786	120.412	121.277	89.6578	87.7215	88.8943	96.5076	98.7383	109.225	101.596	96.5019	94.557	130.559	108.494	139.607	104.771	104.334	120	103.428	101	129.589	128	95	96.3761	100	120.705	143	109	86.7124	90	135.336	123	114	94.0255	104	125.931	137	116
3fi	73	31	46			3fi	97	91	92
3gi	78	86	69			3gi	95	109	102
3hi	91	93	70			3hi	87	85	72
3ii	68	72	63			3ii	110	119	88
3ji	16	15	37			3ji	142	122	96
3ki	48	62	63			3ki	154	125	134
3li	76	62	65			3li	124	138	117
3mi	51	62	57			3mi	181	152	142
3ni	58	65	62			3ni	171	142	119
3oi	69	59	62			3oi	126	113	144
3pi	61	70	68			3pi	107	105	157
3qi	58	31	56			3qi	100	111	103
3ri	49	49	45			3ri	94	92	107
3si	68	85	75			3si	84	81	85
3ti	73	80	74			3ti	115	92	95
3ui	64	59	79			3ui	138	101	137
3wi	49	52	53			3wi	138	124	90
3vi	44	49	48			3vi	171	131	109
5a	79	88	75			5a	125	123	132
5b	41	54	44			5b	115	110	101
5c	-90	-33	-26			5c	115	94	114
5d	71	67	65			5d	126	110	107
5e	33	25	-13			5e	63	66	84
5f	66	60	16			5f	66	73	81
5g	64	64	39			5g	60	68	60
5h	63	38	41			5h	109	97	82
6h	33	23	52			6h	100	80	89
[truncated: 69 more columns]

## Sheet: Fig.S5
										Fig.S5B	immunoblot source data
	Fig.S5A	IL-6 ELISA
	DMSO	-353.714	-333.714	-45.5	-45.5	-37.1667	-46.3333
	LPS	1006.29	926.286	485.333	395.333	482.833	382
	LPS/SB2037 2.5 μM	577.714	680.571	352	272.833	334.5	247.833
	LPS/SB2037 5 μM	517.714	560.571	219.5	249.5	214.5	212
	LPS/SB2037 10 μM	300.571	357.714	191.167	197.833	188.667	127
	LPS/SB2037 20 μM	140.571	169.143	108.667	62	67.8333	44.5
	Fig.S5C	IL-1β mRNA relative level
	DMSO	1	1	1	1
	SB2037	0.806552	0.500278	0.792136	1.14889
	LPS	15067.2	15523.9	18744.3	23948.1
	LPS/SB2037	8408.02	7928.55	13412	17168.2					Fig.S5E	immunoblot source data
	Fig.S5D	Nuclear p65/total ratio
	DMSO	0.265343	0.236586	0.113755	0.104122	0.231962
	SB2037	0.131023	0.142796	0.14108	0.126033	0.194897
	LPS	0.937433	0.844886	0.957853	0.934203	0.72085
	LPS/SB2037	0.152965	0.240293	0.23452	0.272514	0.150137
